# Supplementary material for: An efficient photocatalyst based on H5PMo10V2O40/UiO-66-NH2 for direct hydroxylation of benzene to phenol by H2O2
Source: Royal Society of Chemistry journal article supplement (doi:10.1039/d2ra06197j), 2022-01-01
Supplement: d2ra06197j1.pdf [file d2ra06197j1.pdf]

## Supporting Information

### An Efficient Photocatalyst based on $\text{H}_5\text{PMo}_{10}\text{V}_2\text{O}_{40}/\text{UiO}-66\text{-NH}_2$ for Direct Hydroxylation of Benzene to Phenol by $\text{H}_2\text{O}_2$

Xu Jia <sup>a</sup>, Fuying Wang <sup>a</sup>, Hao Wen <sup>a</sup>, Liuxue Zhang <sup>a\*</sup>, Shuyan Jiao <sup>a\*</sup>,  
Xiulian Wang <sup>b</sup>, Xinyi Pei <sup>a</sup>, Shuzhou Xing <sup>a</sup>

<sup>1</sup> School of Materials and Chemical Engineering, Zhongyuan University of Technology, Zhengzhou, 450007, PR China

<sup>2</sup> School of Energy and Environment, Zhongyuan University of Technology, Zhengzhou, 450007, PR China

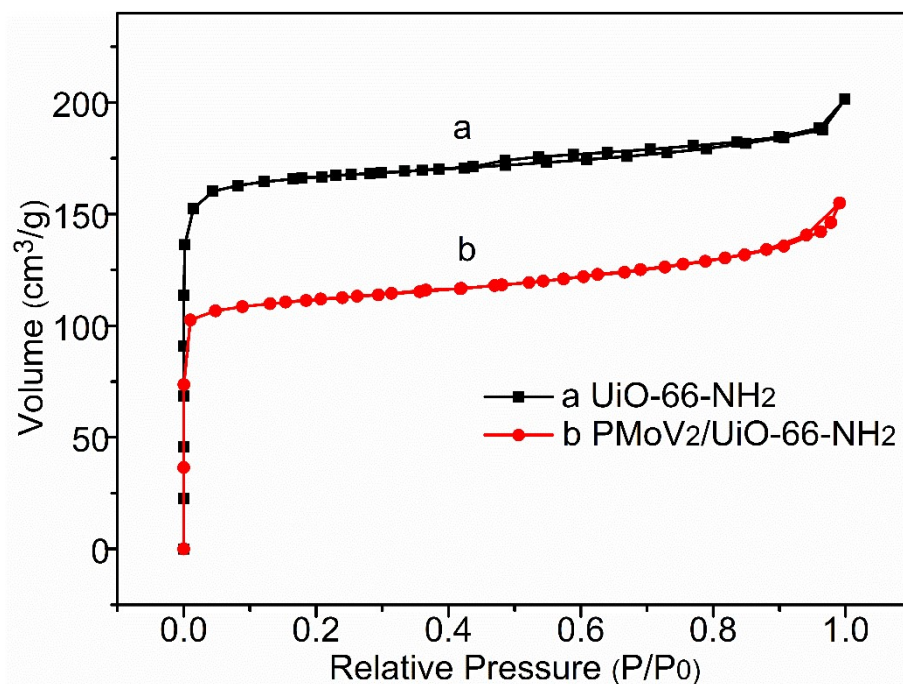

Fig S11.  $\text{N}_2$  adsorption-desorption isotherms of  $\text{UiO}-66\text{-NH}_2$ ,  $\text{H}_5\text{PMo}_{10}\text{V}_2\text{O}_{40}$  and  $\text{H}_5\text{PMo}_{10}\text{V}_2\text{O}_{40}/\text{UiO}-66\text{-NH}_2$ .

\* Corresponding author. Email address: [zhanglx@zut.edu.cn](mailto:zhanglx@zut.edu.cn) (Liuxue Zhang); [jiaosy@zut.edu.cn](mailto:jiaosy@zut.edu.cn) (Shuyan Jiao).

Tel.: +86 -731-62506699; Fax: +86-731-62506095

Table S11. The specific surface area, pore volume and pore diameter of UiO-66-NH<sub>2</sub>, H<sub>5</sub>PMo<sub>10</sub>V<sub>2</sub>O<sub>40</sub> and H<sub>5</sub>PMo<sub>10</sub>V<sub>2</sub>O<sub>40</sub>/UiO-66-NH<sub>2</sub>.

| sample                                                                                  | S <sub>BET</sub> (m <sup>2</sup> /g) | Pore volume (cm <sup>3</sup> /g) | Average pore size (nm) |
|-----------------------------------------------------------------------------------------|--------------------------------------|----------------------------------|------------------------|
| UiO-66-NH <sub>2</sub>                                                                  | 661                                  | 0.405                            | 2.384                  |
| H <sub>5</sub> PMo <sub>10</sub> V <sub>2</sub> O <sub>40</sub>                         | 9                                    | 0.016                            | 2.108                  |
| H <sub>5</sub> PMo <sub>10</sub> V <sub>2</sub> O <sub>40</sub> /UiO-66-NH <sub>2</sub> | 512                                  | 0.285                            | 2.019                  |
